# Supplementary material for: CRED9: a differentially expressed elncRNA regulates expression of transcription factor CEBPA
Source: RNA. 2021 Aug;27(8):891–906. doi: 10.1261/rna.078752.121 (PMC8284328; doi:10.1261/rna.078752.121)
Supplement: Supplemental Material [file supp_078752.121_Supplemental_Material.xlsx]

## Sheet: Final Calculations ddPCR
Sample	Theoretical input amount target (ng)	Target	Target Copies Per 20 µl Well	Reference	Reference Copies Per 20 µl Well	Reference Theoretical copies per ng	Average Reference Value	Percent of Average	Calculated ng input RNA	Target copies per ng input RNA		Theoretical input amount reference (ng)	Target copies per 10ng input RNA
						F(line n)/ M(line n)	AVERAGE of all values in column G per sample set	G(line n)/ Average from Column H	B(line n)* I(line n)	D(line n)/ J(line n)
Multi cell line
Hep3b-1	90.9091	eRNA	1820	GAPDH	35640	39204	43391.3	0.903498	82.1362	22.1583		0.909091	221.583
Hep3b-2	90.9091	eRNA	1700	GAPDH	37300	41030		0.945581	85.9619	19.7762		0.909091	197.762
Hep3b-3	90.9091	eRNA	1640	GAPDH	45400	49940		1.15092	104.629	15.6744		0.909091	156.744
Adipose-1	90.9091	eRNA	952	GAPDH	18260	4017.2	3894	1.03164	93.7853	10.1508		4.54545	101.508
Adipose-2	90.9091	eRNA	846	GAPDH	17140	3770.8		0.968362	88.0329	9.61005		4.54545	96.1005
HepG2-1	90.9091	eRNA	674	GAPDH	24740	27214	25226.7	1.07878	98.0708	6.87258		0.909091	68.7258
HepG2-2	90.9091	eRNA	542	GAPDH	16820	18502		0.73343	66.6755	8.12893		0.909091	81.2893
HepG2-3	90.9091	eRNA	834	GAPDH	27240	29964		1.18779	107.981	7.72358		0.909091	77.2358
HL-60-1	90.9091	eRNA	438	GAPDH	26060	28666	22440	1.27745	116.132	3.77157		0.909091	37.7157
HL-60-2	90.9091	eRNA	230	GAPDH	18860	20746		0.92451	84.0463	2.73659		0.909091	27.3659
HL-60-3	90.9091	eRNA	192	GAPDH	16280	17908		0.798039	72.549	2.64649		0.909091	26.4649
Hela-1	90.9091	eRNA	18	GAPDH	15360	16896	18377.3	0.919393	83.5812	0.215359		0.909091	2.15359
Hela-2	90.9091	eRNA	16	GAPDH	15740	17314		0.942139	85.649	0.186809		0.909091	1.86809
Hela-3	90.9091	eRNA	44	GAPDH	19020	20922		1.13847	103.497	0.425133		0.909091	4.25133
Jurkat-1	90.9091	eRNA	10.2	GAPDH	39100	43010	47373.3	0.907895	82.5359	0.123583		0.909091	1.23583
Jurkat-2	90.9091	eRNA	0	GAPDH	53400	58740		1.23994	112.722	0		0.909091	0
Jurkat-3	90.9091	eRNA	28	GAPDH	36700	40370		0.852167	77.4697	0.361431		0.909091	3.61431
Hep3b-1	0.909091	CEBPA	5360	GAPDH	35640	39204	43391.3	0.903498	0.821362	6525.74		0.909091	65257.4
Hep3b-2	0.909091	CEBPA	5760	GAPDH	37300	41030		0.945581	0.859619	6700.65		0.909091	67006.5
Hep3b-3	0.909091	CEBPA	7220	GAPDH	45400	49940		1.15092	1.04629	6900.56		0.909091	69005.6
Adipose-1	4.54545	CEBPA	10080	GAPDH	18260	4017.2	3894	1.03164	4.68927	2149.59		4.54545	21495.9
Adipose-2	4.54545	CEBPA	10160	GAPDH	17140	3770.8		0.968362	4.40164	2308.23		4.54545	23082.3
HepG2-1	0.909091	CEBPA	1980	GAPDH	24760	27236	25219.3	1.07997	0.981786	2016.73		0.909091	20167.3
HepG2-2	0.909091	CEBPA	1388	GAPDH	16800	18480		0.732771	0.666156	2083.6		0.909091	20836
HepG2-3	0.909091	CEBPA	2680	GAPDH	27220	29942		1.18726	1.07933	2483.02		0.909091	24830.2
HL-60-1	0.909091	CEBPA	3540	GAPDH	26060	28666	22440	1.27745	1.16132	3048.26		0.909091	30482.6
HL-60-2	0.909091	CEBPA	2260	GAPDH	18860	20746		0.92451	0.840463	2688.99		0.909091	26889.9
HL-60-3	0.909091	CEBPA	1880	GAPDH	16280	17908		0.798039	0.72549	2591.35		0.909091	25913.5
Hela-1	90.9091	CEBPA	68	GAPDH	15360	16896	18377.3	0.919393	83.5812	0.81358		0.909091	8.1358
Hela-2	90.9091	CEBPA	96	GAPDH	15740	17314		0.942139	85.649	1.12085		0.909091	11.2085
Hela-3	90.9091	CEBPA	114	GAPDH	19020	20922		1.13847	103.497	1.10148		0.909091	11.0148
Jurkat-1	18.1818	CEBPA	384	GAPDH	39100	43010	47373.3	0.907895	16.5072	23.2626		0.909091	232.626
Jurkat-2	18.1818	CEBPA	402	GAPDH	53400	58740		1.23994	22.5443	17.8315		0.909091	178.315
Jurkat-3	18.1818	CEBPA	348	GAPDH	36700	40370		0.852167	15.4939	22.4604		0.909091	224.604
200nM gap4
Hep3b scr-1	90.9091	eRNA	1700	GAPDH	53000	58300	58153.3	1.00252	91.1384	18.653		0.909091	186.53
Hep3b scr-2	90.9091	eRNA	1880	GAPDH	49000	53900		0.92686	84.26	22.3119		0.909091	223.119
Hep3b scr-3	90.9091	eRNA	2100	GAPDH	56600	62260		1.07062	97.3289	21.5763		0.909091	215.763
Hep3b gap4-1	90.9091	eRNA	1060	GAPDH	50000	55000	55000	1	90.9091	11.66		0.909091	116.6
Hep3b gap4-2	90.9091	eRNA	932	GAPDH	53600	58960		1.072	97.4545	9.56343		0.909091	95.6343
Hep3b gap4-3	90.9091	eRNA	966	GAPDH	46400	51040		0.928	84.3636	11.4504		0.909091	114.504
Hep3b scr-1	0.909091	CEBPA	6300	GAPDH	50200	55220	57126.7	0.966624	0.878749	7169.28		0.909091	71692.8
Hep3b scr-2	0.909091	CEBPA	7520	GAPDH	49000	53900		0.943517	0.857743	8767.19		0.909091	87671.9
Hep3b scr-3	0.909091	CEBPA	8560	GAPDH	56600	62260		1.08986	0.990781	8639.65		0.909091	86396.5
Hep3b gap4-1	0.909091	CEBPA	3520	GAPDH	50000	55000	55000	1	0.909091	3872		0.909091	38720
Hep3b gap4-2	0.909091	CEBPA	3500	GAPDH	53600	58960		1.072	0.974545	3591.42		0.909091	35914.2
Hep3b gap4-3	0.909091	CEBPA	3540	GAPDH	46400	51040		0.928	0.843636	4196.12		0.909091	41961.2
Hep3b scr-1	0.909091	CEBPG	1500	GAPDH	50200	55220	57126.7	0.966624	0.878749	1706.97		0.909091	17069.7
Hep3b scr-2	0.909091	CEBPG	1640	GAPDH	49000	53900		0.943517	0.857743	1911.99		0.909091	19119.9
Hep3b scr-3	0.909091	CEBPG	1980	GAPDH	56600	62260		1.08986	0.990781	1998.42		0.909091	19984.2
Hep3b gap4-1	0.909091	CEBPG	2020	GAPDH	50000	55000	55000	1	0.909091	2222		0.909091	22220
Hep3b gap4-2	0.909091	CEBPG	2220	GAPDH	53600	58960		1.072	0.974545	2277.99		0.909091	22779.9
Hep3b gap4-3	0.909091	CEBPG	1940	GAPDH	46400	51040		0.928	0.843636	2299.57		0.909091	22995.7
Hep3b scr-1	0.909091	Albumin	166000	GAPDH	50200	55220	57126.7	0.966624	0.878749	188905		0.909091	1.88905e+06
Hep3b scr-2	0.909091	Albumin	123200	GAPDH	49000	53900		0.943517	0.857743	143633		0.909091	1.43633e+06
Hep3b scr-3	0.909091	Albumin	164000	GAPDH	56600	62260		1.08986	0.990781	165526		0.909091	1.65526e+06
Hep3b gap4-1	0.909091	Albumin	108000	GAPDH	50000	55000	55000	1	0.909091	118800		0.909091	1.188e+06
Hep3b gap4-2	0.909091	Albumin	103600	GAPDH	53600	58960		1.072	0.974545	106306		0.909091	1.06306e+06
Hep3b gap4-3	0.909091	Albumin	57800	GAPDH	46400	51040		0.928	0.843636	68512.9		0.909091	685129
150nM gap6
Hep3b scr-1	90.9091	eRNA	1460	GAPDH	53000	58300	54486.7	1.06999	97.2715	15.0095		0.909091	150.095
Hep3b scr-2	90.9091	eRNA	1540	GAPDH	45000	49500		0.908479	82.589	18.6465		0.909091	186.465
Hep3b scr-3	90.9091	eRNA	1600	GAPDH	50600	55660		1.02153	92.8668	17.229		0.909091	172.29
Hep3b gap4-1	90.9091	eRNA	1012	GAPDH	44300	48730	45650	1.06747	97.0427	10.4284		0.909091	104.284
Hep3b gap4-2	90.9091	eRNA	1060	GAPDH	47540	52294		1.14554	104.14	10.1786		0.909091	101.786
Hep3b gap4-3	90.9091	eRNA	1008	GAPDH	32660	35926		0.786988	71.5444	14.0892		0.909091	140.892
Hep3b scr-1	0.909091	CEBPA	6220	GAPDH	53000	58300	54486.7	1.06999	0.972715	6394.47		0.909091	63944.7
Hep3b scr-2	0.909091	CEBPA	6280	GAPDH	45000	49500		0.908479	0.82589	7603.92		0.909091	76039.2
Hep3b scr-3	0.909091	CEBPA	6920	GAPDH	50600	55660		1.02153	0.928668	7451.54		0.909091	74515.4
Hep3b gap4-1	0.909091	CEBPA	2700	GAPDH	44300	48730	45650	1.06747	0.970427	2782.28		0.909091	27822.8
Hep3b gap4-2	0.909091	CEBPA	2800	GAPDH	47540	52294		1.14554	1.0414	2688.68		0.909091	26886.8
Hep3b gap4-3	0.909091	CEBPA	3260	GAPDH	32660	35926		0.786988	0.715444	4556.61		0.909091	45566.1
Hep3b scr-1	0.909091	CEBPG	1960	GAPDH	53000	58300	54486.7	1.06999	0.972715	2014.98		0.909091	20149.8
Hep3b scr-2	0.909091	CEBPG	1760	GAPDH	45000	49500		0.908479	0.82589	2131.03		0.909091	21310.3
Hep3b scr-3	0.909091	CEBPG	1880	GAPDH	50600	55660		1.02153	0.928668	2024.41		0.909091	20244.1
Hep3b gap4-1	0.909091	CEBPG	2820	GAPDH	44300	48730	45650	1.06747	0.970427	2905.94		0.909091	29059.4
Hep3b gap4-2	0.909091	CEBPG	2860	GAPDH	47540	52294		1.14554	1.0414	2746.3		0.909091	27463
Hep3b gap4-3	0.909091	CEBPG	2700	GAPDH	32660	35926		0.786988	0.715444	3773.88		0.909091	37738.8
Hep3b scr-1	0.909091	Albumin	182000	GAPDH	53000	58300	54486.7	1.06999	0.972715	187105		0.909091	1.87105e+06
Hep3b scr-2	0.909091	Albumin	208000	GAPDH	45000	49500		0.908479	0.82589	251849		0.909091	2.51849e+06
Hep3b scr-3	0.909091	Albumin	188000	GAPDH	50600	55660		1.02153	0.928668	202441		0.909091	2.02441e+06
Hep3b gap4-1	0.909091	Albumin	105600	GAPDH	44300	48730	45650	1.06747	0.970427	108818		0.909091	1.08818e+06
Hep3b gap4-2	0.909091	Albumin	109400	GAPDH	47540	52294		1.14554	1.0414	105051		0.909091	1.05051e+06
Hep3b gap4-3	0.909091	Albumin	99800	GAPDH	32660	35926		0.786988	0.715444	139494		0.909091	1.39494e+06
30nM saRNA
G2 Scr 48 - 1	90.9091	eRNA	690	GAPDH	27940	30734	36461.3	0.84292	76.6291	9.00441		0.909091	90.0441
G2 Scr 48 - 2	90.9091	eRNA	736	GAPDH	33380	36718		1.00704	91.549	8.03941		0.909091	80.3941
G2 Scr 48 - 3	90.9091	eRNA	932	GAPDH	38120	41932		1.15004	104.549	8.91447		0.909091	89.1447
G2 saRNA 48 - 1	90.9091	eRNA	1056	GAPDH	30580	33638	30814.7	1.09162	99.2385	10.641		0.909091	106.41
G2 saRNA 48 - 2	90.9091	eRNA	1152	GAPDH	28820	31702		1.0288	93.5269	12.3173		0.909091	123.173
G2 saRNA 48 - 3	90.9091	eRNA	958	GAPDH	24640	27104		0.879581	79.9619	11.9807		0.909091	119.807
G2 Scr 48 - 1	0.909091	CEBPA	1654	GAPDH	27940	30734	36461.3	0.84292	0.766291	2158.45		0.909091	21584.5
G2 Scr 48 - 2	0.909091	CEBPA	2290	GAPDH	33380	36718		1.00704	0.91549	2501.39		0.909091	25013.9
G2 Scr 48 - 3	0.909091	CEBPA	2580	GAPDH	38120	41932		1.15004	1.04549	2467.74		0.909091	24677.4
G2 saRNA 48 - 1	0.909091	CEBPA	4180	GAPDH	30580	33638	30814.7	1.09162	0.992385	4212.08		0.909091	42120.8
G2 saRNA 48 - 2	0.909091	CEBPA	4360	GAPDH	28820	31702		1.0288	0.935269	4661.76		0.909091	46617.6
G2 saRNA 48 - 3	0.909091	CEBPA	3840	GAPDH	24640	27104		0.879581	0.799619	4802.29		0.909091	48022.9
Hela Scr - 1	90.9091	eRNA	26	GAPDH	43600	47960	56760	0.844961	76.8147	0.338477		0.909091	3.38477
Hela Scr - 2	90.9091	eRNA	19.2	GAPDH	50000	55000		0.968992	88.0902	0.217958		0.909091	2.17958
Hela Scr - 3	90.9091	eRNA	34	GAPDH	61200	67320		1.18605	107.822	0.315333		0.909091	3.15333
Hela saRNA - 1	90.9091	eRNA	100	GAPDH	45620	50182	42973.3	1.16775	106.159	0.941985		0.909091	9.41985
Hela saRNA - 2	90.9091	eRNA	120	GAPDH	40560	44616		1.03823	94.3841	1.2714		0.909091	12.714
Hela saRNA - 3	90.9091	eRNA	74	GAPDH	31020	34122		0.794027	72.1843	1.02515		0.909091	10.2515
Hela Scr - 1	90.9091	CEBPA	444	GAPDH	43600	47960	56760	0.844961	76.8147	5.78015		0.909091	57.8015
Hela Scr - 2	90.9091	CEBPA	404	GAPDH	50000	55000		0.968992	88.0902	4.58621		0.909091	45.8621
Hela Scr - 3	90.9091	CEBPA	500	GAPDH	61200	67320		1.18605	107.822	4.63725		0.909091	46.3725
Hela saRNA - 1	90.9091	CEBPA	1972	GAPDH	45620	50182	42973.3	1.16775	106.159	18.5759		0.909091	185.759
Hela saRNA - 2	90.9091	CEBPA	2174	GAPDH	40560	44616		1.03823	94.3841	23.0335		0.909091	230.335
Hela saRNA - 3	90.9091	CEBPA	1606	GAPDH	31020	34122		0.794027	72.1843	22.2486		0.909091	222.486
VPR-dcas9
Hela-VPR-ctrl-1	90.9091	eRNA	46	GAPDH	104600	115060	109193	1.05373	95.7934	0.4802		0.909091	4.802
Hela-VPR-ctrl-2	90.9091	eRNA	32	GAPDH	99400	109340		1.00134	91.0312	0.351528		0.909091	3.51528
Hela-VPR-ctrl-3	90.9091	eRNA	30	GAPDH	93800	103180		0.944929	85.9027	0.349232		0.909091	3.49232
Hela-VPR-eRNA-act-1	90.9091	eRNA	146	GAPDH	76200	83820	75166.7	1.11512	101.375	1.4402		0.909091	14.402
Hela-VPR-eRNA-act-2	90.9091	eRNA	152	GAPDH	56800	62480		0.83122	75.5654	2.0115		0.909091	20.115
Hela-VPR-eRNA-act-3	90.9091	eRNA	136	GAPDH	72000	79200		1.05366	95.7871	1.41981		0.909091	14.1981
Hela-VPR-ceb-act-1	90.9091	eRNA	132	GAPDH	66200	72820	76413.3	0.952975	86.6341	1.52365		0.909091	15.2365
Hela-VPR-ceb-act-2	90.9091	eRNA	142	GAPDH	67800	74580		0.976008	88.728	1.6004		0.909091	16.004
Hela-VPR-ceb-act-3	90.9091	eRNA	154	GAPDH	74400	81840		1.07102	97.3652	1.58167		0.909091	15.8167
Hela-VPR-ctrl-1	90.9091	CEBPA	1400	GAPDH	104600	115060	109193	1.05373	95.7934	14.6148		0.909091	146.148
Hela-VPR-ctrl-2	90.9091	CEBPA	1360	GAPDH	99400	109340		1.00134	91.0312	14.9399		0.909091	149.399
Hela-VPR-ctrl-3	90.9091	CEBPA	1420	GAPDH	93800	103180		0.944929	85.9027	16.5303		0.909091	165.303
Hela-VPR-eRNA-act-1	90.9091	CEBPA	8840	GAPDH	76200	83820	75166.7	1.11512	101.375	87.2012		0.909091	872.012
Hela-VPR-eRNA-act-2	90.9091	CEBPA	8500	GAPDH	56800	62480		0.83122	75.5654	112.485		0.909091	1124.85
Hela-VPR-eRNA-act-3	90.9091	CEBPA	7760	GAPDH	72000	79200		1.05366	95.7871	81.013		0.909091	810.13
Hela-VPR-ceb-act-1	90.9091	CEBPA	38000	GAPDH	66200	72820	76413.3	0.952975	86.6341	438.626		0.909091	4386.26
Hela-VPR-ceb-act-2	90.9091	CEBPA	36160	GAPDH	67800	74580		0.976008	88.728	407.538		0.909091	4075.38
Hela-VPR-ceb-act-3	90.9091	CEBPA	41420	GAPDH	74400	81840		1.07102	97.3652	425.409		0.909091	4254.09
eRNA - oligo(dT) - Hep3b
Hep3B - oligo dT - 1	90.9091	eRNA	618	GAPDH	38440	42284	48957.3	0.863691	78.5173	7.87087		0.909091	78.7087
Hep3B - oligo dT - 2	90.9091	eRNA	500	GAPDH	48400	53240		1.08748	98.8616	5.05758		0.909091	50.5758
Hep3B - oligo dT - 3	90.9091	eRNA	680	GAPDH	46680	51348		1.04883	95.3483	7.13175		0.909091	71.3175
Chr 15 ctrl
Hep3B -200nM ctrla -1	0.909091	B2M	5240	GAPDH	36740	40414	44858	0.900932	0.819029	6397.82		0.909091	63978.2
Hep3B -200nM ctrla -2	0.909091	B2M	7580	GAPDH	43080	47388		1.0564	0.960364	7892.84		0.909091	78928.4
Hep3B -200nM ctrla -3	0.909091	B2M	7600	GAPDH	42520	46772		1.04267	0.94788	8017.89		0.909091	80178.9
Hep3B -200nM Gap4 -1	0.909091	B2M	7800	GAPDH	41320	45452	44982.7	1.01043	0.918576	8491.4		0.909091	84914
Hep3B -200nM Gap4 -2	0.909091	B2M	6960	GAPDH	42920	47212		1.04956	0.954145	7294.49		0.909091	72944.9
Hep3B -200nM Gap4 -3	0.909091	B2M	6780	GAPDH	38440	42284		0.940007	0.854551	7933.99		0.909091	79339.9
Chr 19 ctrl
Hep3B -200nM ctrla -1	0.909091	TBCB	782	GAPDH	33720	37092	32560	1.13919	1.03563	755.098		0.909091	7550.98
Hep3B -200nM ctrla -2	0.909091	TBCB	722	GAPDH	28440	31284		0.960811	0.873464	826.594		0.909091	8265.94
Hep3B -200nM ctrla -3	0.909091	TBCB	658	GAPDH	26640	29304		0.9	0.818182	804.222		0.909091	8042.22
Hep3B -200nM Gap4 -1	0.909091	TBCB	748	GAPDH	26760	29436	28871.3	1.01956	0.926871	807.016		0.909091	8070.16
Hep3B -200nM Gap4 -2	0.909091	TBCB	796	GAPDH	29800	32780		1.13538	1.03217	771.194		0.909091	7711.94
Hep3B -200nM Gap4 -3	0.909091	TBCB	606	GAPDH	22180	24398		0.84506	0.768236	788.82		0.909091	7888.2
